# Supplementary material for: Viral Prevalence and Genomic Xenology in the Coevolution of HzNV-2 (Nudiviridae) with Host Helicoverpa zea (Lepidoptera: Noctuidae)
Source: MDPI journal article supplement (doi:10.3390/insects14100797), 2023-09-30
Supplement: s1 [file s1]

**Supplementary Table S1** Individual samples tested for presence of HzNV-2 with ddPCR. Samples with GenBank accession numbers were Sanger sequenced.

| Specimen ID | Species | date collected | Life Stage | Origin                                    | Positive Droplets | Total Droplets | Concentration copies/uL of PCR | HzNV-2 presence/absence | Fig. 1 column | Fig. 2 column | heavy band w/TE | light band | GenBank ID |
|-------------|---------|----------------|------------|-------------------------------------------|-------------------|----------------|--------------------------------|-------------------------|---------------|---------------|-----------------|------------|------------|
| 123         | Ha      | 3 Oct 2013     | adult      | Valencia, Spain                           | 0                 | 16334          | 0                              | 0                       | n/a           | 11            | n/a             | n/a        | n/a        |
| 141         | Ha      | Dec 2013       | adult      | CSIRO lab colony, Australia               | 0                 | 16071          | 0                              | 0                       | n/a           | 12            | n/a             | n/a        | n/a        |
| 144         | Ha      | Dec 2014       | adult      | CSIRO lab colony, Australia               | 2                 | 15211          | 0.15                           | 0                       | n/a           | 13            | n/a             | n/a        | n/a        |
| 269         | Ha      | 5 Nov 2015     | adult      | Zambesiaca, South Africa                  | 1                 | 14581          | 0.08                           | 0                       | n/a           | 14            | n/a             | n/a        | n/a        |
| 343         | Ha      | Dec 2014       | adult      | CSIRO lab colony, Australia               | 2                 | 15175          | 0.16                           | 0                       | n/a           | 15            | n/a             | n/a        | n/a        |
| 171         | Hz      | 16 July 2013   | adult      | Yuma County, Colorado, USA                | 9                 | 16128          | 0.66                           | 1                       | 7             | n/a           | n/a             | n/a        | n/a        |
| 351         | Hz      | 25 July 2014   | adult      | Alamosa County, Colorado, USA             | 1                 | 16373          | 0.07                           | 0                       | n/a           | n/a           | 1               | 0          | n/a        |
| 352         | Hz      | 25 July 2014   | adult      | Alamosa County, Colorado, USA             | 1                 | 17302          | 0.07                           | 0                       | n/a           | n/a           | 1               | 0          | n/a        |
| 353         | Hz      | 25 July 2014   | adult      | Alamosa County, Colorado, USA             | 0                 | 17651          | 0                              | 0                       | n/a           | n/a           | 1               | 0          | n/a        |
| 355         | Hz      | 25 July 2014   | adult      | Alamosa County, Colorado, USA             | 2                 | 17937          | 0.13                           | 0                       | n/a           | n/a           | 1               | 0          | n/a        |
| 464         | Hz      | 20 Oct 2014    | adult      | McClean County, Kentucky, USA             | 668               | 18730          | 42.7                           | 1                       | n/a           | n/a           | 1               | 0          | n/a        |
| 493         | Hz      | 2014           | larvae     | LSU Ag Center, MaconRidge, Louisiana, USA | 0                 | 18962          | 0                              | 0                       | 8             | n/a           | 1               | 0          | Acc#       |
| 494         | Hz      | 2014           | adult      | LSU Ag Center, MaconRidge, Louisiana, USA | 0                 | 17319          | 0                              | 0                       | 7             | n/a           | 1               | 1          | Acc#, #    |
| 495         | Hz      | 2014           | adult      | LSU Ag Center, MaconRidge, Louisiana, USA | 2                 | 18046          | 0.13                           | 0                       | n/a           | n/a           | 1               | 0          | n/a        |
| 1012        | Hz      | 11 Aug 2015    | adult      | Shelby County, Tennessee, USA             | 12                | 16977          | 0.83                           | 1                       | 6             | n/a           | n/a             | n/a        | n/a        |
| 1111        | Hz      | 18 Aug 2015    | adult      | Miami-Dade County, Florida, USA           | 5                 | 17261          | 0.34                           | 1                       | n/a           | 2             | n/a             | n/a        | n/a        |
| 1116        | Hz      | 18 Aug 2015    | adult      | Miami-Dade County, Florida, USA           | 5                 | 19061          | 0.31                           | 0                       | n/a           | n/a           | 1               | 0          | n/a        |
| 1155        | Hz      | 18 Aug 2015    | adult      | Manatee County, Florida, USA              | 1                 | 17451          | 0.07                           | 0                       | n/a           | n/a           | 1               | 1          | n/a        |
| 1158        | Hz      | 19 Aug 2015    | adult      | Manatee County, Florida, USA              | 27                | 18980          | 1.7                            | 1                       | n/a           | 3             | n/a             | n/a        | n/a        |
| 1751        | Hz      | 1 Sep 2015     | adult      | Penobscot County, Maine, USA              | 36                | 18707          | 2.3                            | 1                       | n/a           | n/a           | 1               | 0          | n/a        |
| 1877        | Hz      | 25 Sep 2015    | adult      | Larimer County, Colorado, USA             | 5018              | 15560          | 458                            | 1                       | 2             | 1             | n/a             | n/a        | n/a        |
| 2191        | Hz      | 27 Oct 2015    | adult      | Guanica, Puerto Rico                      | 2                 | 18630          | 0.13                           | 0                       | n/a           | 4             | n/a             | n/a        | n/a        |
| 2196        | Hz      | 4 Nov 2015     | adult      | Guanica, Puerto Rico                      | 1                 | 19857          | 0.06                           | 0                       | n/a           | n/a           | 1               | 0          | n/a        |
| 2264        | Hz      | 23 Oct 2015    | adult      | Juana Diaz, Puerto Rico                   | 300               | 16526          | 21.3                           | 1                       | 3             | n/a           | n/a             | n/a        | n/a        |
| 2313        | Hz      | 23 Mar 2015    | adult      | Juana Diaz, Puerto Rico                   | 2                 | 16338          | 0.14                           | 0                       | n/a           | 5             | n/a             | n/a        | n/a        |
| 2330        | Hz      | 27 July 2015   | adult      | Juana Diaz, Puerto Rico                   | 5520              | 19398          | 394                            | 1                       | n/a           | n/a           | 1               | 0          | n/a        |
| 3513        | Hz      | 1 July 2016    | adult      | Guanica, Puerto Rico                      | 1                 | 18882          | 0.06                           | 0                       | n/a           | n/a           | 1               | 0          | n/a        |
| 3519        | Hz      | 1 July 2016    | adult      | Guanica, Puerto Rico                      | 2821              | 20322          | 176                            | 1                       | n/a           | n/a           | 1               | 0          | n/a        |
| 3553        | Hz      | 27 July 2016   | adult      | Juana Diaz, Puerto Rico                   | 199               | 19119          | 12.3                           | 1                       | n/a           | n/a           | 1               | 0          | n/a        |
| 4672        | Hz      | 9 Feb 2016     | adult      | Manatee County, Florida, USA              | 1                 | 17953          | 0.07                           | 0                       | n/a           | n/a           | 1               | 0          | n/a        |
| 5111        | Hz      | 26 July 2016   | adult      | Hamilton County, Florida, USA             | 548               | 12928          | 51                             | 1                       | n/a           | 6             | n/a             | n/a        | n/a        |
| 5112        | Hz      | 26 July 2016   | adult      | Hamilton County, Florida, USA             | 553               | 17982          | 36.7                           | 1                       | n/a           | n/a           | 1               | 0          | n/a        |
| 6793        | Hz      | 27 Aug 2015    | adult      | Morrow County, Oregon, USA                | 77                | 18487          | 4.9                            | 1                       | n/a           | n/a           | 1               | 0          | n/a        |
| 7049        | Hz      | 29 Nov 2017    | adult      | Jackson County, Florida, USA              | 0                 | 17773          | 0                              | 0                       | n/a           | n/a           | 1               | 0          | n/a        |
| 7050        | Hz      | 5 July 2016    | adult      | Jackson County, Florida, USA              | 1                 | 17199          | 0.07                           | 0                       | n/a           | n/a           | 1               | 0          | n/a        |
| 4643a       | Hz      | 5 May 2016     | adult      | Manatee County, Florida, USA              | 2873              | 16968          | 218                            | 1                       | 1             | n/a           | n/a             | n/a        | n/a        |
| 4643b       | Hz      | 5 May 2016     | adult      | Manatee County, Florida, USA              | 3503              | 16548          | 280                            | 1                       | 4             | n/a           | n/a             | n/a        | n/a        |
| ard1        | Hz      | 2015           | adult      | Larimer County, Colorado, USA             | 3                 | 16898          | 0.21                           | 0                       | 5             | n/a           | n/a             | n/a        | n/a        |
| a/z 1       | Hz x Ha | 2017           | adult      | USDA lab colony, Massachusetts, USA       | 0                 | 19407          | 0.06                           | 0                       | n/a           | 9             | 1               | 1          | Acc#, #    |
| a/z 14      | Hz x Ha | 2017           | adult      | USDA lab colony, Massachusetts, USA       | 1                 | 17489          | 0.07                           | 0                       | n/a           | n/a           | 1               | 1          | n/a        |
| a/z 2       | Hz x Ha | 2017           | adult      | USDA lab colony, Massachusetts, USA       | 1                 | 18839          | 0.06                           | 0                       | n/a           | 10            | 1               | 1          | n/a        |
| a/z 3       | Hz x Ha | 2017           | adult      | USDA lab colony, Massachusetts, USA       | 2                 | 18798          | 0.13                           | 0                       | n/a           | n/a           | 0               | 1          | n/a        |
| a/z 4       | Hz x Ha | 2017           | adult      | USDA lab colony, Massachusetts, USA       | 2                 | 17587          | 0.13                           | 0                       | n/a           | n/a           | 0               | 1          | n/a        |
| a/z 5       | Hz x Ha | 2017           | adult      | USDA lab colony, Massachusetts, USA       | 0                 | 17066          | 0                              | 0                       | n/a           | n/a           | 1               | 1          | n/a        |

**Supplementary Table S2** ddPCR results from bulk samples tested for prevalence of H<sub>2</sub>NV-2

| Year collected | Life Stage | Origin      | Positive droplets | Total droplets | Concentration copies/uL of PCR | H <sub>2</sub> NV-2 presence/absence | Number of individuals in each bulk extraction |
|----------------|------------|-------------|-------------------|----------------|--------------------------------|--------------------------------------|-----------------------------------------------|
| 2019           | adults     | Texas       | 20                | 19679          | 1.2                            | 1                                    | 3                                             |
| 2019           | adults     | Texas       | 1909              | 19528          | 121                            | 1                                    | 14                                            |
| 2019           | adults     | Texas       | 2760              | 19908          | 176                            | 1                                    | 3                                             |
| 2020           | adults     | Georgia     | 2                 | 20870          | 0.11                           | 0                                    | 10                                            |
| 2020           | adults     | Georgia     | 86                | 20697          | 4.9                            | 1                                    | 40                                            |
| 2020           | adults     | Georgia     | 48                | 19542          | 2.9                            | 1                                    | 27                                            |
| 2020           | adults     | Lousiana    | 2                 | 17828          | 0.13                           | 0                                    | 10                                            |
| 2020           | adults     | Lousiana    | 5911              | 20180          | 408                            | 1                                    | 34                                            |
| 2020           | adults     | Lousiana    | 16                | 20542          | 0.92                           | 0                                    | 3                                             |
| 2019           | adults     | Missouri    | 4                 | 16840          | 0.28                           | 0                                    | 40                                            |
| 2019           | adults     | Missouri    | 5                 | 21025          | 0.28                           | 0                                    | 47                                            |
| 2019           | adults     | Missouri    | 3099              | 21224          | 186                            | 1                                    | 47                                            |
| 2020           | adults     | Indiana     | 2                 | 20847          | 0.11                           | 0                                    | 2                                             |
| 2020           | adults     | Indiana     | 13                | 19678          | 0.78                           | 0                                    | 3                                             |
| 2020           | adults     | Indiana     | 1                 | 18571          | 0.06                           | 0                                    | 5                                             |
| 2020           | adults     | New Mexico  | 564               | 19989          | 33.7                           | 1                                    | 33                                            |
| 2020           | adults     | New Mexico  | 1                 | 17635          | 0.07                           | 0                                    | 33                                            |
| 2020           | adults     | New Mexico  | 1                 | 19050          | 0.06                           | 0                                    | 33                                            |
| 2020           | adults     | Illinois    | 267               | 19555          | 16.2                           | 1                                    | 33                                            |
| 2020           | adults     | Illinois    | 1192              | 19266          | 75.1                           | 1                                    | 33                                            |
| 2020           | adults     | Illinois    | 0                 | 8820           | 0                              | 0                                    | 13                                            |
| 2019           | adults     | Mississippi | 8260              | 20533          | 605                            | 1                                    | 67                                            |
| 2019           | adults     | Mississippi | 8                 | 18664          | 0.5                            | 0                                    | 67                                            |
| 2019           | adults     | Mississippi | 2221              | 19979          | 139                            | 1                                    | 67                                            |
| 2020           | adults     | Florida     | 748               | 8967           | 102                            | 1                                    | 13                                            |
| 2020           | adults     | Florida     | 64                | 19282          | 3.9                            | 1                                    | 27                                            |
| 2020           | adults     | Florida     | 1027              | 19953          | 62.2                           | 1                                    | 7                                             |
| 2016           | adults     | Colorado    | 7683              | 19841          | 576                            | 1                                    | 100                                           |
| 2016           | adults     | Colorado    | 5023              | 19162          | 358                            | 1                                    | 200                                           |

**Supplementary Table S3.** Results of model tests for each gene cds alignment used in the DNA-based phylogenetic analysis.

| ORF   | AICc    | BIC       |
|-------|---------|-----------|
| PCFT  | GTR+I+G | TVMef+I+G |
| TS    | GTR+I+G | GTR+I+G   |
| cSHMT | GTR+I+G | TrN+I+G   |
| RNR   | GTR+I+G | GTR+I+G   |

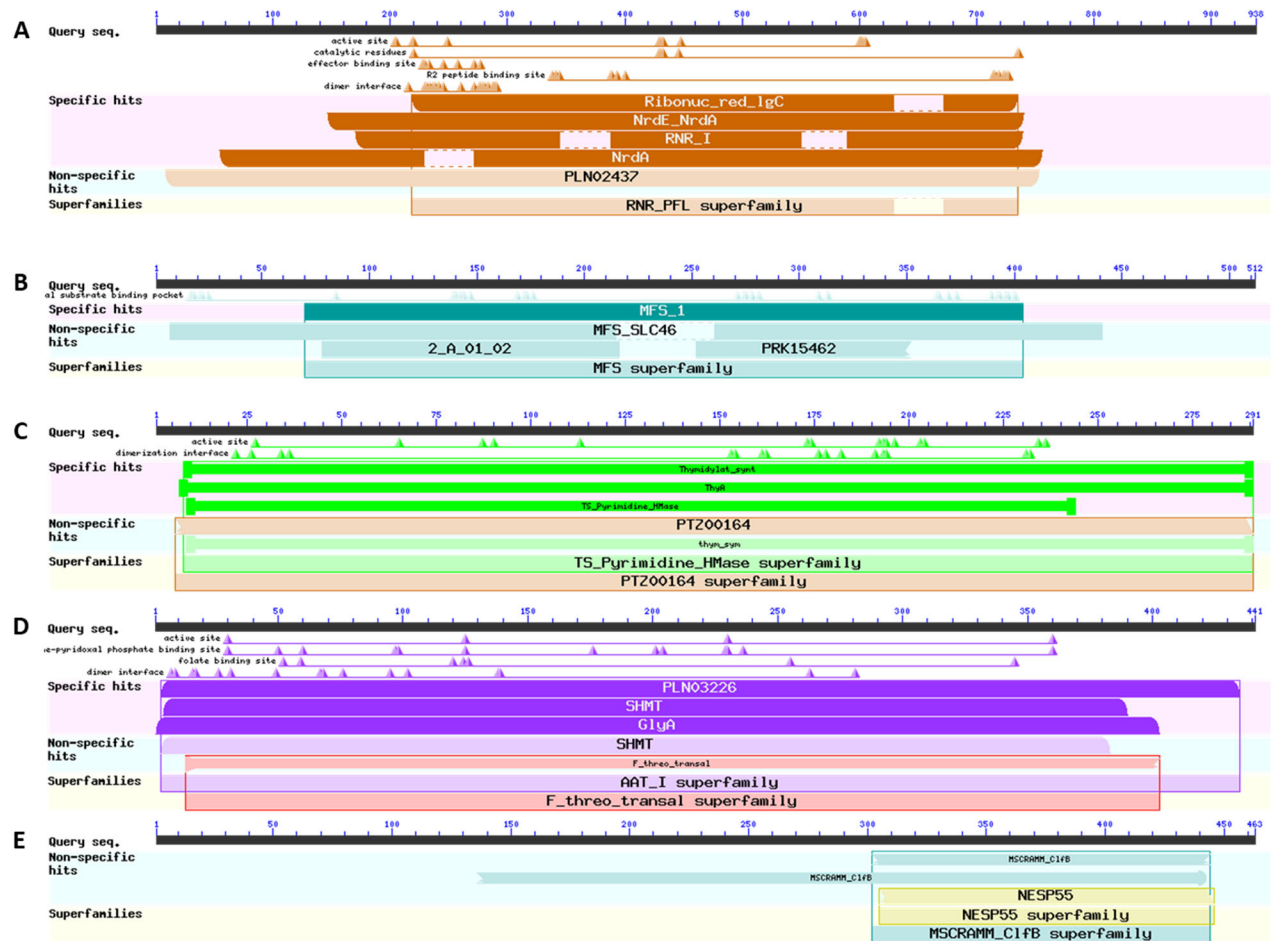

**Figure S1.** Translated HzNV-2 ORFs inferred to be recent host acquisitions BLASTP searched against the clustered nr database. A) ORF Hz2V047 annotated as Ribonucelotide reductase (RNR), B) ORF Hz2V066 annotated as Serine hydroxymethyltransferase (SHMT), C) ORF Hz2V023 annotated as Proton coupled folate transporter (PCFT), D) ORF Hz2V035 annotated as Thymidylate synthase (TS), and E) ORF Hz2V091 annotated as bacterial cell surface protein.

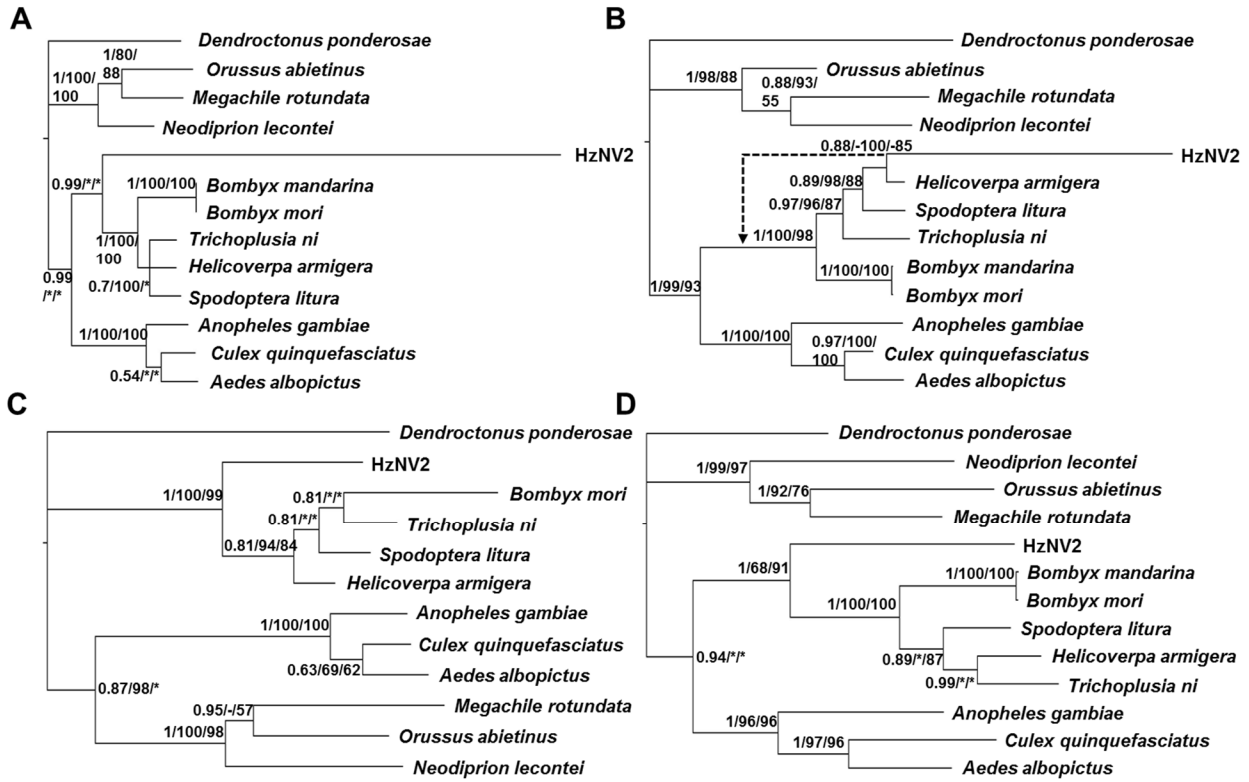

**Figure S2.** Phylogenetic analyses of sequences from A) RNR; B) cSHMT; C) PCFT; and D) TS.

Numbers adjacent to nodes indicate posterior probability from Bayesian inference (BI), jackknife values from neighbor joining, and bootstrap values from the parsimony method. All trees shown in figure are from the BI results, \* indicates collapse of branch in the corresponding method and – indicates different branching order. Different branching order and associated support values shown where relevant.

*Dendroctonus ponderosae* was set as the outgroup in all analyses.

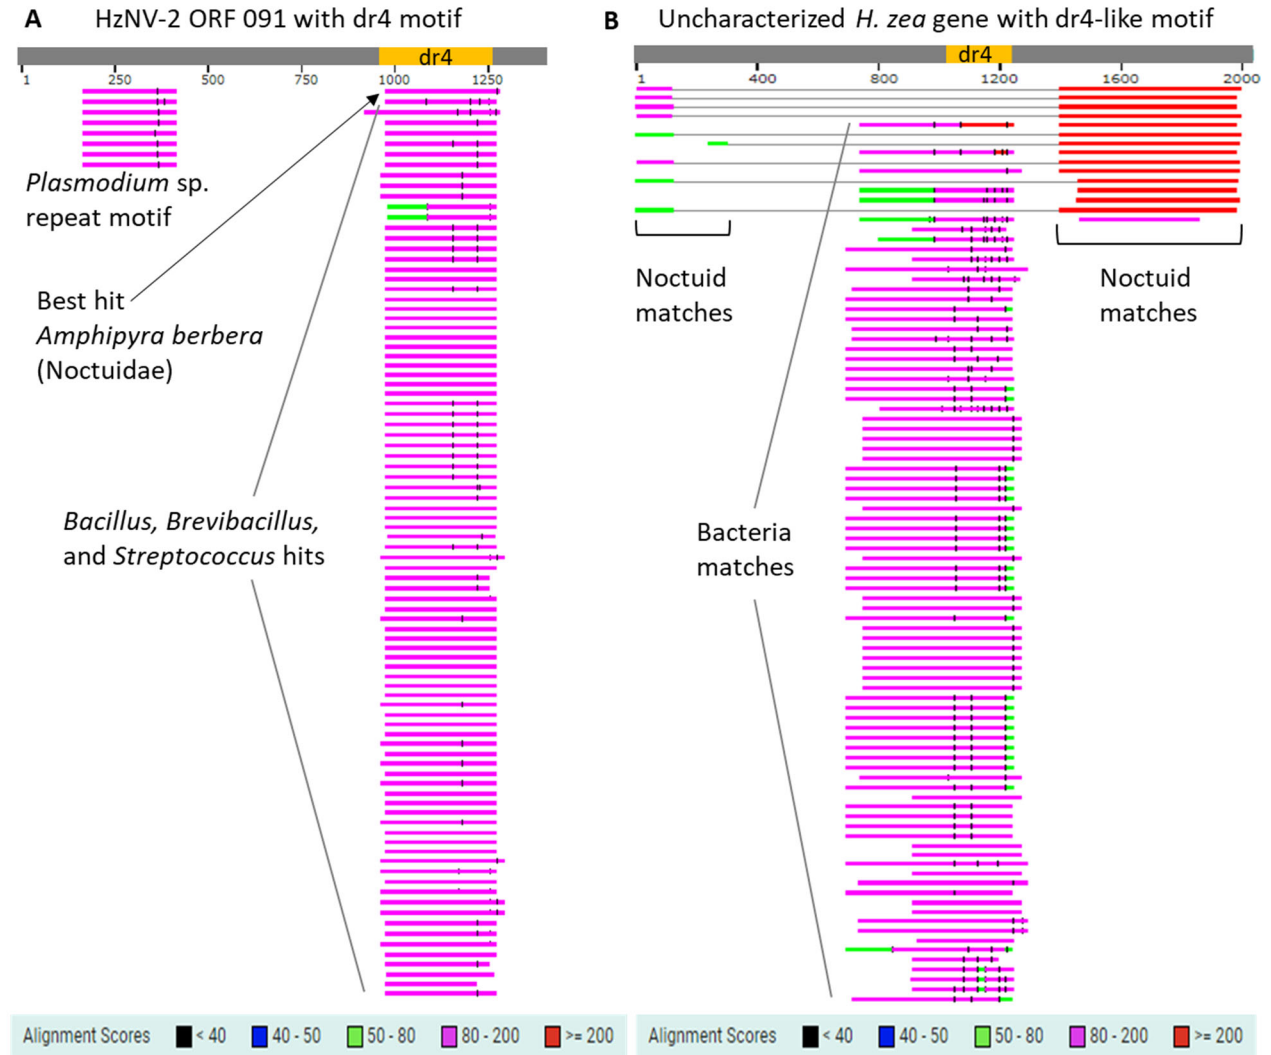

**Figure S3.** Best sequence matches mapped to A) HzNV-2 ORF Hz2V091 and B) an *H. zea* gene of unknown function with a central region similar to HzNV-2 dr4 in ORF Hz2V091.

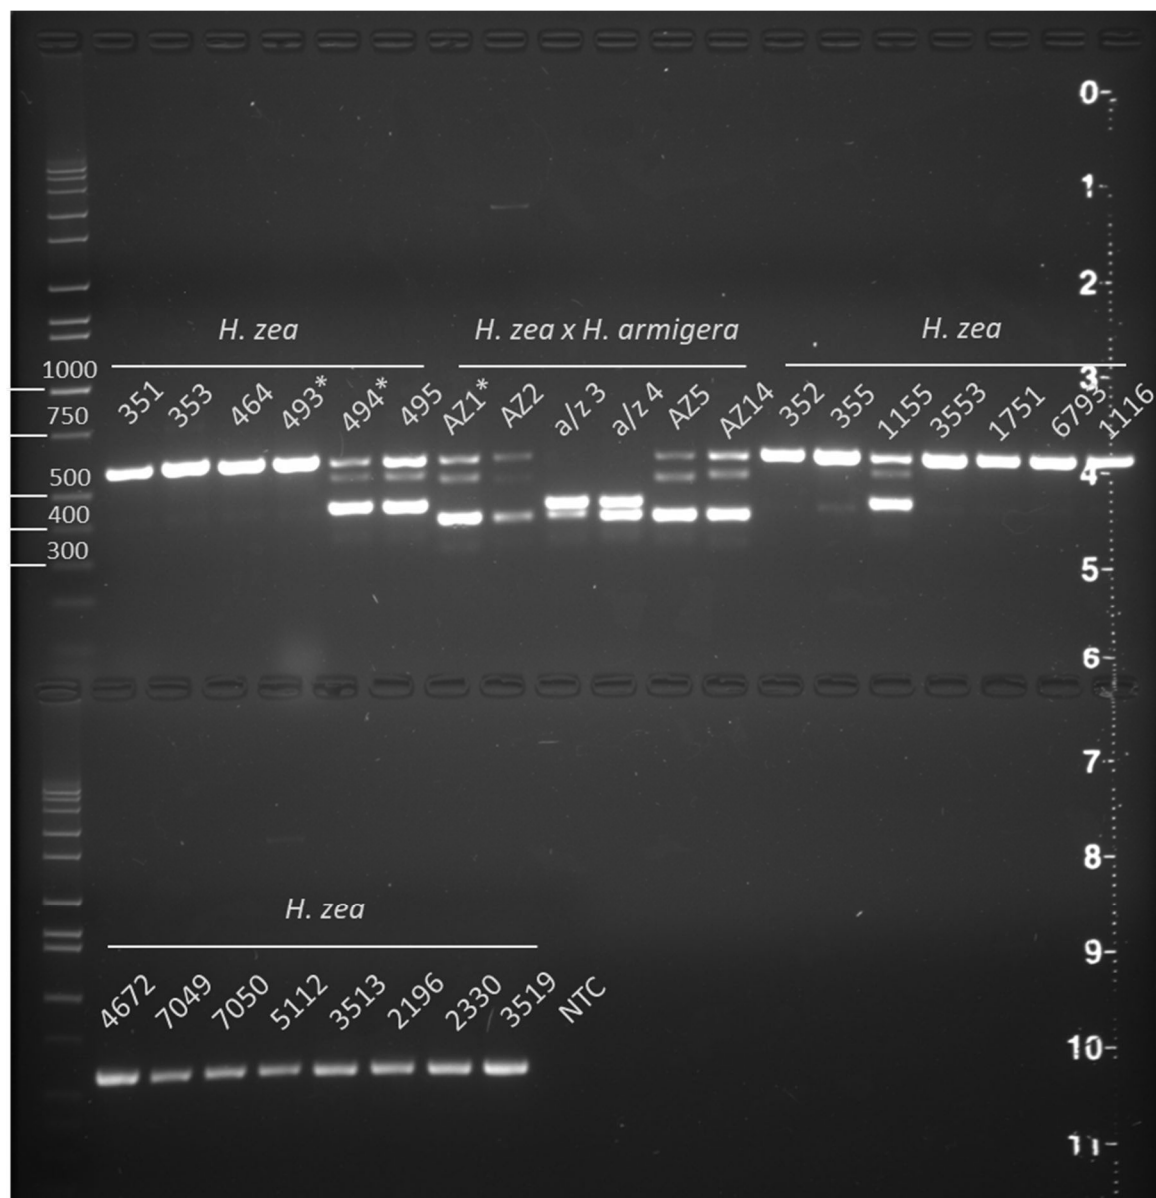

**Figure S4.** Agarose gel (1%) of PCR products spanning the TE insert in intron 7 of cSHMT from *H. zea*, and lab-reared hybrids. HzNV-2 test results on these samples can be found in Supplementary Table S1. \* Refers to samples that were Sanger sequenced; accessions given in Table S1.

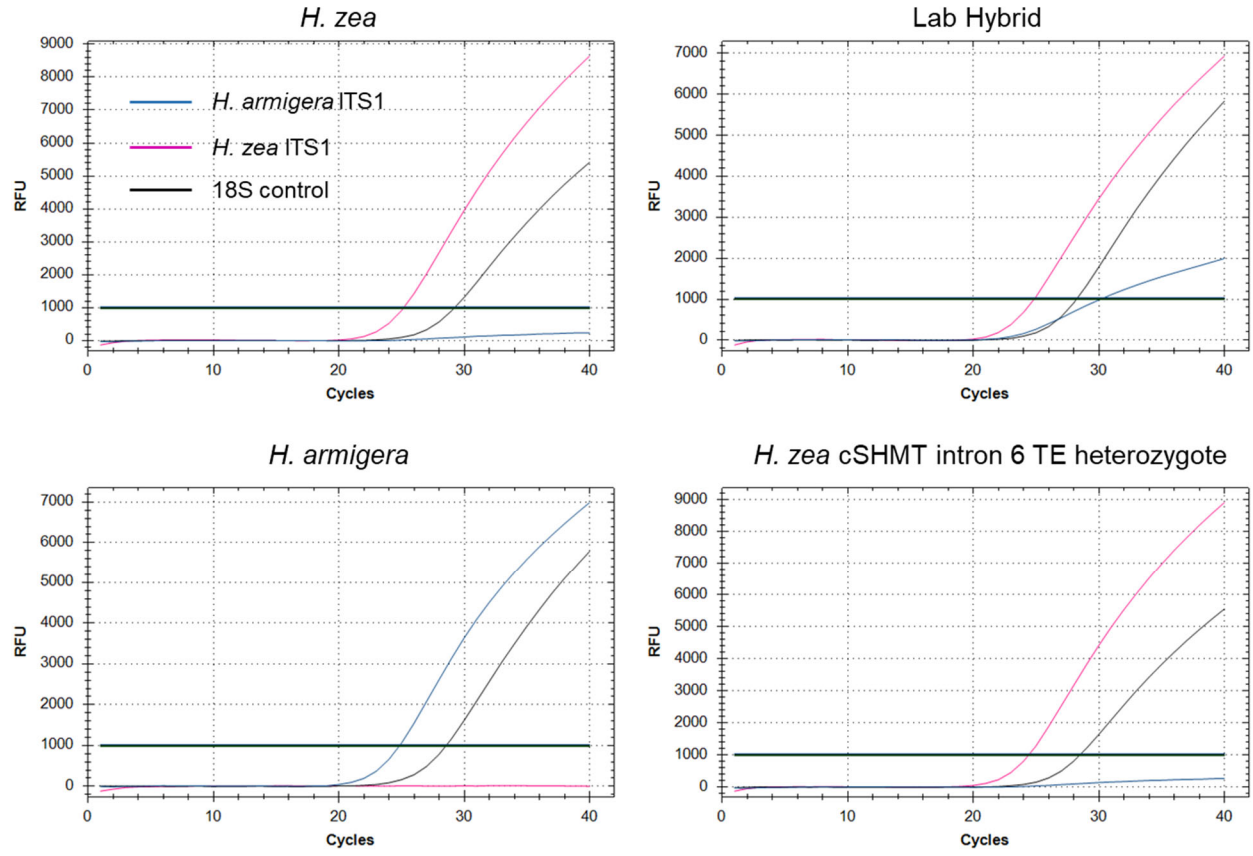

**Figure S5.** The cSHMT Intron 7 TE-inserted specimen with gel banding pattern similar to *H. zea* x *H. armigera* lab hybrid specimens but is identified as *H. zea* using the validated real-time PCR method from Gilligan et al. (2015).



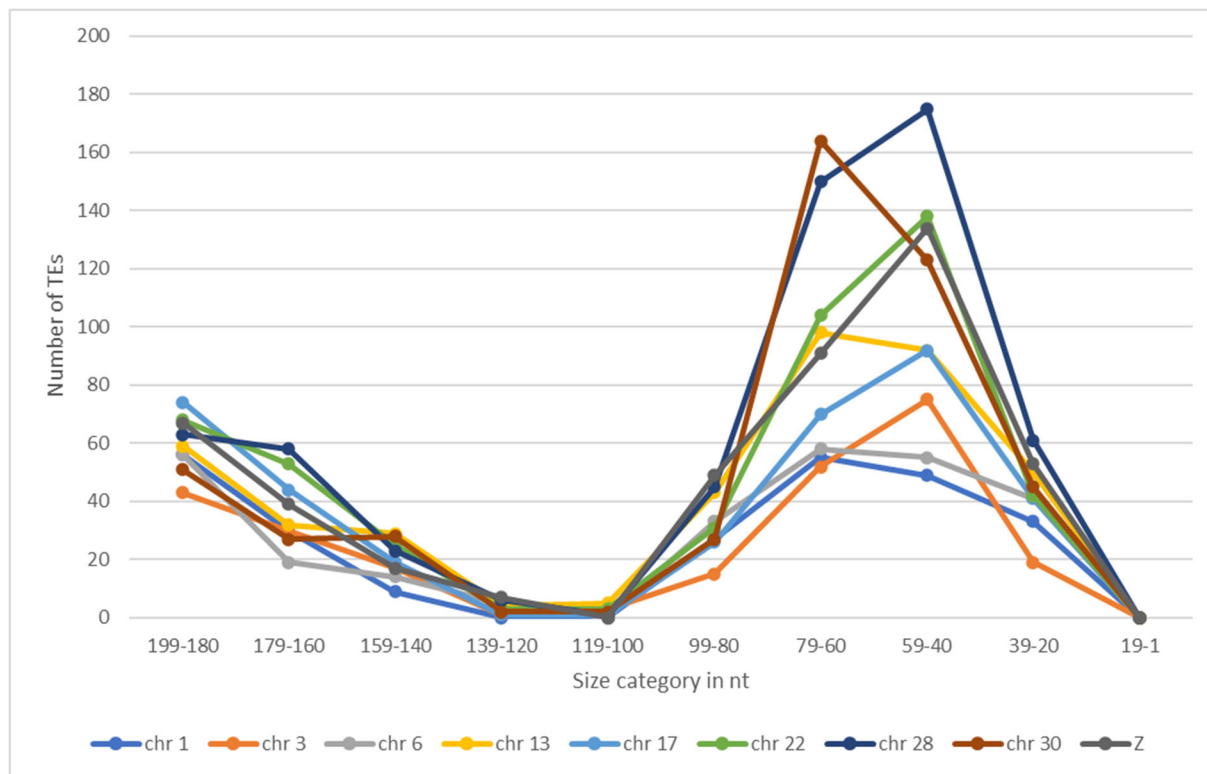

**Figure S6.** The size distribution of TEs with similar sequence identities (cutoff e-value  $\leq 0.01$ ) to those found in P450 genes and cSHMT intron 7 across a subset of chromosomes.

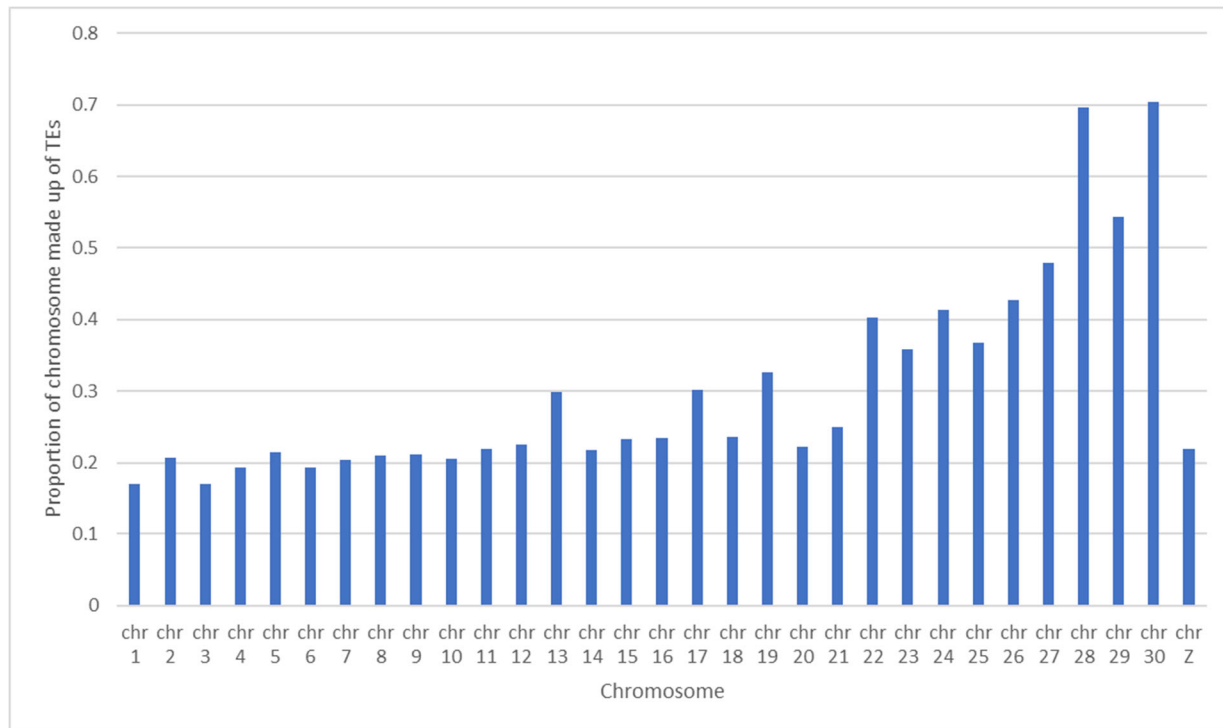

**Figure S7.** The proportion of each *H. zea* chromosome made up of TEs with similar sequence identities (cutoff e-value  $\leq 0.01$ ) to those found in P450 genes and cSHMT intron 7. Chromosomes ordered largest (15.51 Mb chr 1) to smallest (6.32 Mb chr 30) with the Z chromosome at 18.81 Mb listed last.

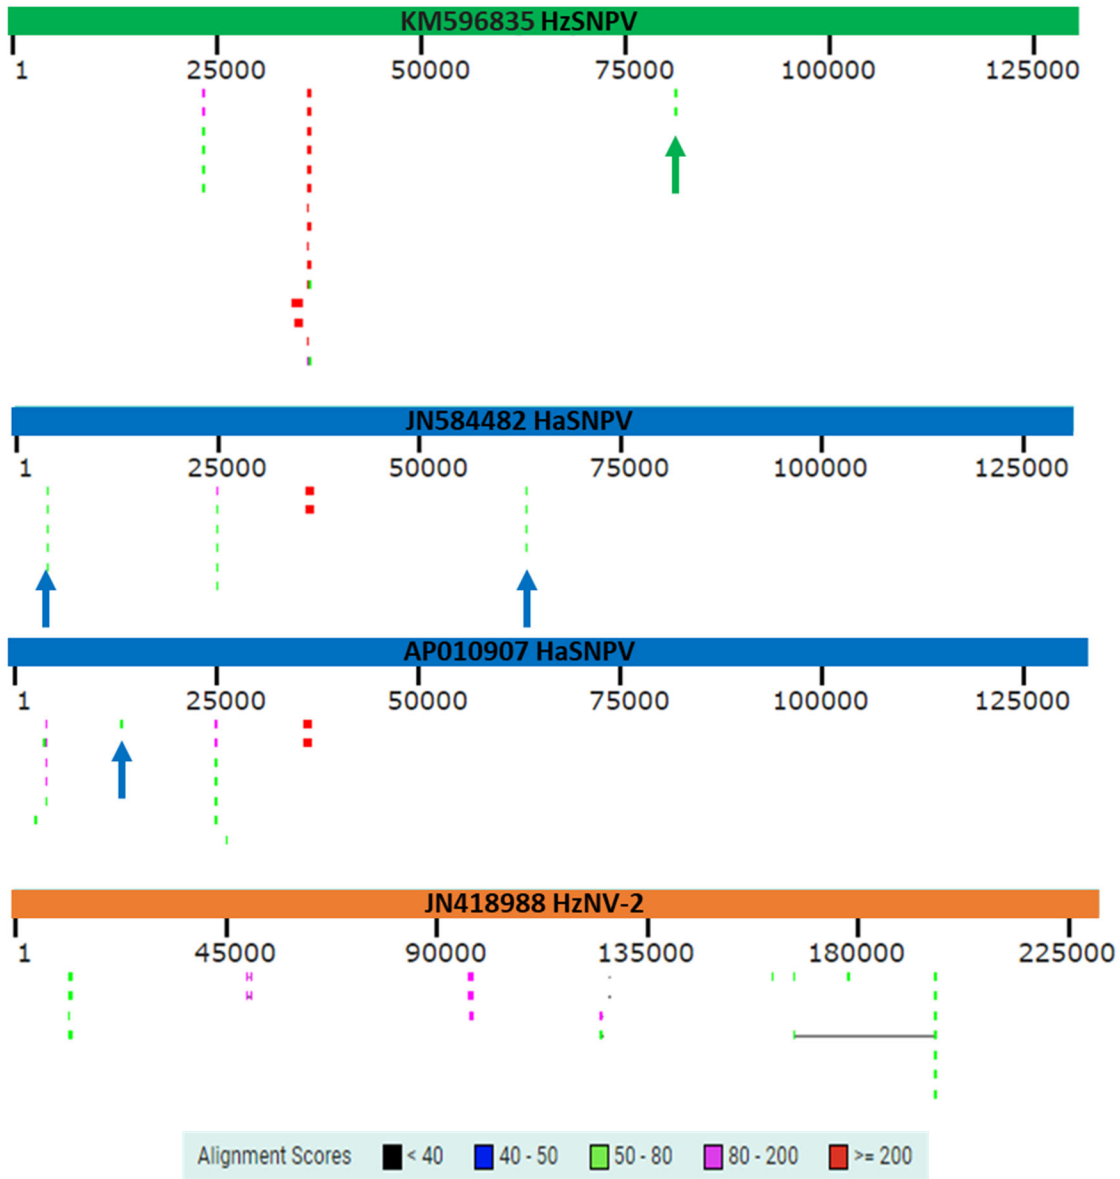

**Figure S8.** Inferred recent host DNA acquisitions mapped to baculoviruses HaSNPV (blue), HzSNPV (green), and nudivirus HzNV-2 (orange). Arrows indicate inferred host DNA acquisitions since *H. armigera* and *H. zea* divergence (for the baculoviruses only as the sister species of HzNV-2 has not been determined). All searches used complete viral genomes as queries to wgs *H. armigera* taxid 29058. Viral genomes not to scale.
